# Supplementary material for: Mesenchymal Stem Cell Homing Into Intervertebral Discs Enhances the Tie2-positive Progenitor Cell Population, Prevents Cell Death, and Induces a Proliferative Response
Source: PubMed Central journal article supplement — Spine (Phila Pa 1976). 2019 Jul 22;44(23):1613–22. doi: 10.1097/BRS.0000000000003150 (PMC6867676; doi:10.1097/brs.0000000000003150), 2019-07-22
Supplement: brs-44-1613-s001.pdf [file brs-44-1613-s001.pdf]

**Supplementary Table 1 – Fraction of proliferating disc cells as % (Table, Fig. 7)**

| IVD tissue   | Donor # | Flow cytometry |         |             | IHC  |         |             |
|--------------|---------|----------------|---------|-------------|------|---------|-------------|
|              |         | ctrl           | treated | fold change | ctrl | treated | fold change |
| healthy      | hD#1    | -              | -       | -           | 16.6 | 26.0    | 1.5         |
|              | hD#2    | 2.9            | 1.5     | 0.5         | 15.5 | 10.4    | 0.6         |
|              | hD#3    | 1.5            | 2.7     | 1.8         | 3.1  | 9.2     | 2.9         |
| trauma       | hD#4    | 0.2            | 0.3     | 1.5         | -    | -       | -           |
|              | hD#7    | 1.6            | 3.0     | 1.8         | -    | -       | -           |
| degenerative | hD#8    | 0.2            | 0.5     | 2.5         | -    | -       | -           |
|              | hD#10   | 0.3            | 2.6     | 8.6         | -    | -       | -           |

MSCs  
( $3 \times 10^6$ , PKH26)

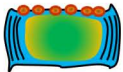

5d

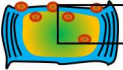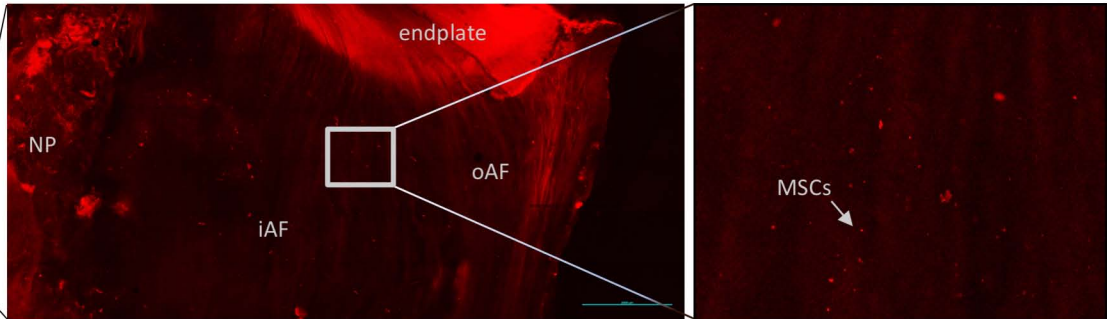

**a**

| Patient ID | Age | Sex | Level     | Pathology |
|------------|-----|-----|-----------|-----------|
| MSC#1      | 51  | M   | L5        | trauma    |
| MSC#2      | 77  | M   | L3        | trauma    |
| MSC#3      | 78  | F   | Th8       | trauma    |
| MSC#4      | 63  | M   | Th11 + L1 | trauma    |
| MSC#5      | 52  | M   | TH11 + L1 | trauma    |
| MSC#6      | 50  | M   | L4        | trauma    |
| MSC#7      | 63  | M   | L1        | trauma    |
| MSC#8      | 65  | M   | L3+ L5    | trauma    |
| MSC#9      | 67  | M   | Th7+Th9   | trauma    |

**b**

| Patient ID | Age | Sex | Level   | Pathology    | MSC# used |
|------------|-----|-----|---------|--------------|-----------|
| hD#1       | 31  | M   | L3-4    | healthy      | MSC#9     |
| hD#2       | 54  | M   | Th12-L1 | healthy      | MSC#9     |
| hD#3       | 63  | M   | L2-3    | healthy      | MSC#9     |
| hD#4       | 72  | M   | L4-5    | trauma       | MSC#9     |
| hD#5       | 81  | F   | L2-3    | trauma       | MSC#1     |
| hD#6       | 26  | M   | Th12-L1 | trauma       | MSC#1     |
| hD#7       | 35  | M   | L1-2    | trauma       | MSC#2     |
| hD#8       | 69  | M   | L2-3    | degenerative | MSC#9     |
| hD#9       | 69  | F   | L3-4    | degenerative | MSC#1     |
| hD#10      | 75  | M   | L4-5    | degenerative | MSC#2     |
